# Supplementary material for: Developing and training mental toughness in sport: a systematic review and meta-analysis of observational studies and pre-test and post-test experiments
Source: PubMed Central journal article supplement — BMJ Open Sport Exerc Med. 2020 Jun 16;6(1):e000747. doi: 10.1136/bmjsem-2020-000747 (PMC7299040; doi:10.1136/bmjsem-2020-000747), 2020-06-16
Supplement: bmjsem-2020-000747supp003.pdf [file bmjsem-2020-000747supp003.pdf]

Table S2

*Analysis of controlled intervention studies (k = 7) using PEDro criteria*

| Criteria                                                                                                                                                                                                                  | Abdelbaky (2012)                    | Ajilchi et al. (2019)               | Ali Rasti et al. (2015)             | Bell et al. (2013)                  | Bhambri et al. (2005)               | Gucciardi et al. (2009)             | Mahoney et al. (2016)               |
|---------------------------------------------------------------------------------------------------------------------------------------------------------------------------------------------------------------------------|-------------------------------------|-------------------------------------|-------------------------------------|-------------------------------------|-------------------------------------|-------------------------------------|-------------------------------------|
| 1. Eligibility criteria were specified*                                                                                                                                                                                   | <input checked="" type="checkbox"/> |
| 2. Subjects were randomly allocated to groups (in a crossover study, subjects were randomly allocated an order in which treatments were received)                                                                         | <input checked="" type="checkbox"/> |
| 3. Allocation was concealed                                                                                                                                                                                               | <input checked="" type="checkbox"/> |
| 4. The groups were similar at baseline regarding the most important prognostic indicators                                                                                                                                 | <input checked="" type="checkbox"/> |
| 5. There was blinding of all subjects                                                                                                                                                                                     | <input checked="" type="checkbox"/> |
| 6. There was blinding of all therapists who administered the therapy                                                                                                                                                      | <input checked="" type="checkbox"/> |
| 7. There was blinding of all assessors who measured at least one key outcome                                                                                                                                              | <input checked="" type="checkbox"/> |
| 8. Measures of at least one key outcome were obtained from more than 85% of the subjects initially allocated to groups                                                                                                    | <input checked="" type="checkbox"/> |
| 9. All subjects for whom outcome measures were available received the treatment or control condition as allocated or, where this was not the case, data for at least one key outcome was analyzed by “intention to treat” | <input checked="" type="checkbox"/> |
| 10. The results of between-group statistical comparisons are reported for at least one key outcome                                                                                                                        | <input checked="" type="checkbox"/> |
| 11. The study provides both point measures and measures of variability for at least one key outcome                                                                                                                       | <input checked="" type="checkbox"/> |

*Note.* \*Criterion not included in total PEDro score calculation.
