# Supplementary material for: Developing and training mental toughness in sport: a systematic review and meta-analysis of observational studies and pre-test and post-test experiments
Source: PubMed Central journal article supplement — BMJ Open Sport Exerc Med. 2020 Jun 16;6(1):e000747. doi: 10.1136/bmjsem-2020-000747 (PMC7299040; doi:10.1136/bmjsem-2020-000747), 2020-06-16
Supplement: bmjsem-2020-000747supp004.pdf [file bmjsem-2020-000747supp004.pdf]

*Analysis of single group pretest-posttest studies (k = 4) using criteria of the Quality Assessment Tool for Before-After (Pre-Post) Studies With No Control Group*

| Criteria                                                                                                                                                                                                                    | Castello et al.<br>(2018)           | Drees & Mack<br>(2012)              | Parkes & Mallett<br>(2011)          | Sheard & Golby<br>(2006)            |
|-----------------------------------------------------------------------------------------------------------------------------------------------------------------------------------------------------------------------------|-------------------------------------|-------------------------------------|-------------------------------------|-------------------------------------|
| 1. Was the study question or objective clearly stated?                                                                                                                                                                      | <input checked="" type="checkbox"/> | <input checked="" type="checkbox"/> | <input checked="" type="checkbox"/> | <input checked="" type="checkbox"/> |
| 2. Were eligibility/selection criteria for the study population prespecified and clearly described?                                                                                                                         | <input checked="" type="checkbox"/> | <input checked="" type="checkbox"/> | <input checked="" type="checkbox"/> | <input checked="" type="checkbox"/> |
| 3. Were the participants in the study representative of those who would be eligible for the test/service/intervention in the general or clinical population of interest?                                                    | CD                                  | <input checked="" type="checkbox"/> | <input checked="" type="checkbox"/> | <input checked="" type="checkbox"/> |
| 4. Were all eligible participants that met the prespecified entry criteria enrolled?                                                                                                                                        | <input checked="" type="checkbox"/> | <input checked="" type="checkbox"/> | <input checked="" type="checkbox"/> | <input checked="" type="checkbox"/> |
| 5. Was the sample size sufficiently large to provide confidence in the findings?                                                                                                                                            | NR                                  | NR                                  | NR                                  | <input checked="" type="checkbox"/> |
| 6. Was the test/service/intervention clearly described and delivered consistently across the study population?                                                                                                              | CD                                  | <input checked="" type="checkbox"/> | <input checked="" type="checkbox"/> | <input checked="" type="checkbox"/> |
| 7. Were the outcome measures prespecified, clearly defined, valid, reliable, and assessed consistently across all study participants?                                                                                       | <input checked="" type="checkbox"/> | <input checked="" type="checkbox"/> | <input checked="" type="checkbox"/> | CD                                  |
| 8. Were the people assessing the outcomes blinded to the participants' exposures/interventions?                                                                                                                             | <input checked="" type="checkbox"/> | <input checked="" type="checkbox"/> | <input checked="" type="checkbox"/> | <input checked="" type="checkbox"/> |
| 9. Was the loss to follow-up after baseline 20% or less? Were those lost to follow-up accounted for in the analysis?                                                                                                        | <input checked="" type="checkbox"/> | <input checked="" type="checkbox"/> | <input checked="" type="checkbox"/> | NR                                  |
| 10. Did the statistical methods examine changes in outcome measures from before to after the intervention? Were statistical tests done that provided <i>p</i> values for the pre-to-post changes?                           | <input checked="" type="checkbox"/> | <input checked="" type="checkbox"/> | <input checked="" type="checkbox"/> | <input checked="" type="checkbox"/> |
| 11. Were outcome measures of interest taken multiple times before the intervention and multiple times after the intervention (i.e., did they use an interrupted time-series design)?                                        | <input checked="" type="checkbox"/> | <input checked="" type="checkbox"/> | <input checked="" type="checkbox"/> | <input checked="" type="checkbox"/> |
| 12. If the intervention was conducted at a group level (e.g., a whole hospital, a community, etc.) did the statistical analysis take into account the use of individual-level data to determine effects at the group level? | NA                                  | NA                                  | NA                                  | NA                                  |

Note. CD, Cannot determine; NA, Not applicable; NR, Not reported.
