# Supplementary material for: Developing and training mental toughness in sport: a systematic review and meta-analysis of observational studies and pre-test and post-test experiments
Source: PubMed Central journal article supplement — BMJ Open Sport Exerc Med. 2020 Jun 16;6(1):e000747. doi: 10.1136/bmjsem-2020-000747 (PMC7299040; doi:10.1136/bmjsem-2020-000747), 2020-06-16
Supplement: bmjsem-2020-000747supp005.pdf [file bmjsem-2020-000747supp005.pdf]

Table S3b

*Quality Rating (Good, Fair, or Poor) of single group pretest-posttest studies (k = 4) per rater*

|                                                    | Castello et al. (2018)                                                                                                                          | Drees & Mack (2012)                                                                           | Parkes & Mallett (2011) | Sheard & Golby (2006)                                                                                                     |
|----------------------------------------------------|-------------------------------------------------------------------------------------------------------------------------------------------------|-----------------------------------------------------------------------------------------------|-------------------------|---------------------------------------------------------------------------------------------------------------------------|
| Rater #1                                           | Poor                                                                                                                                            | Poor                                                                                          | Fair                    | Poor                                                                                                                      |
| Rater #2                                           | Poor                                                                                                                                            | Poor                                                                                          | Fair                    | Poor                                                                                                                      |
| Additional comments<br>(If Poor, please state why) | Unclear definition of population, consistency of intervention unclear, high attrition, lack of details about sample size and statistical power. | Consistency of intervention unclear, lack of details about sample size and statistical power. |                         | Small sample size and statistical power concerns, consistency in measurement of outcomes unclear, attrition not reported. |
